# Supplementary material for: Deciphering the role of Hashimoto's Thyroiditis-related key genes in thyroid cancer via detailed in silico analysis followed by the experimental validation
Source: Springer Nature journal article supplement (doi:10.1186/s41065-025-00429-0), 2025-05-31
Supplement: MOESM1 [file 41065_2025_429_MOESM1_ESM.pdf]

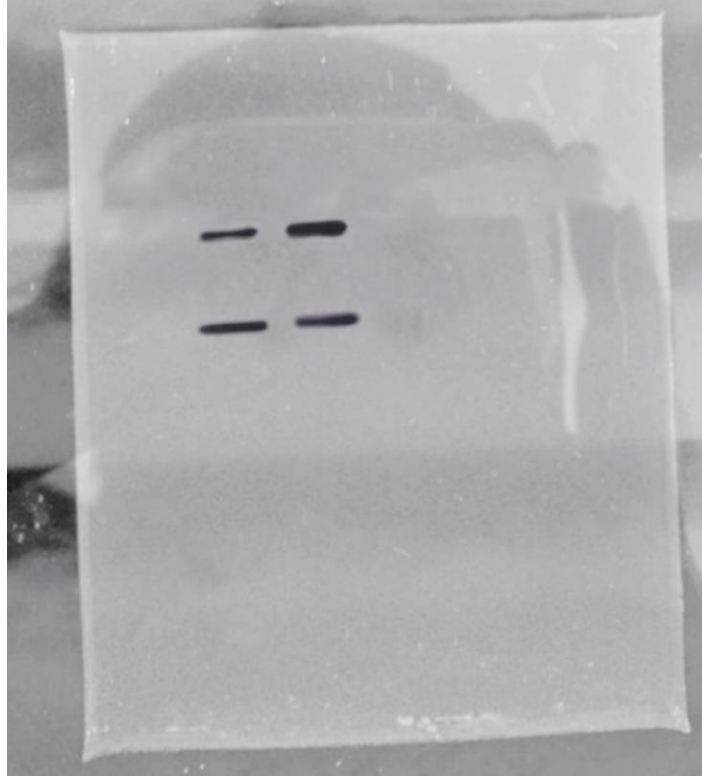

**Supplementary data Figure 1: Uncut Western blot bands of GAPDH and BRAF.**
